# Supplementary material for: Amorphous iridium complexes for electrophosphorescent light emitting devicesElectronic supplementary information (ESI) available: experimental details, synthetic and spectroscopic data. See http://www.rsc.org/suppdata/cc/b2/b200957a/
Source: Royal Society of Chemistry journal article supplement (doi:10.1039/b200957a), 2002-03-14
Supplement: b200957a.doc [file b200957a.doc]

**Supplementary materials**

**General Details.** All metal-mediated coupling reactions were conducted in oven dried glassware under an argon atmosphere. 1H and 13C{1H} NMR spectra were recorded on a Varian Inova 400 NMR spectrometer operating at 400.1 and 100.6 MHz, respectively. UV-Vis absorption spectra were recorded by using a Shimadzu UV-2401PC spectrophotometer. Solution fluorescence spectra were measured on a PTI spectrometer in spectral grade toluene using 90 degree angle detection for solution samples and for films. High-resolution mass spectrometry was performed by the UC Santa Barbara Mass Spectrometry Lab. Differential Scanning Calorimetry data were recorded on a TGA DSC 2920 Modulated DSC. Purity was analyzed on a Shimadzu HPLC equipped with a photodiode array detector. Reagents were obtained from Aldrich Co. and used as received.

**2-Bromo-9,9-dihexyl-fluorene (5).** A 150 mL round bottom flask charged with 2-bromofluorene (10.06 g, 41.4 mmoles, 1 Equiv.), tetrabutylammonium bromide (2.51 g, 7.77 mmoles, 0.2 Equiv.), 1-bromohexane (35 mL, 249 mmoles, 6 Equiv.), and 75 mL of 50% NaOH was placed into an oil bath at 80 ºC and stirred for 4 hours. The mixture was diluted with water and extracted with chloroform, washed twice with water, dried over MgSO4, and the chloroform was removed under vacuum. Excess 1-bromohexane was removed by short path distillation under vacuum at 40 ºC. Silica gel column chromatography in 100% hexanes gave 16.29 g, 96%, of **5**. 1H NMR (400 MHz, CDCl3): 7.68 (m, 1H), 7.57 (d, *J* = 7.7 Hz, 1H), 7.45 (m, 2H), 7.35 (m, 3H), 1.95 (m, 4H), 1.09 (m, 12H), 0.79 (t, *J* = 7.1 Hz, 6H), 0.62(m, 4H). 13C NMR (100 MHz, CDCl3):  153.2, 150.5, 140.4, 140.2, 130.1, 127.7, 127.1, 126.3, 123.1, 121.2, 121.1, 119.9, 55.6, 40.5, 31.7, 29.9, 23.9, 22.8, 14.2. Exact mass (FAB, NBH) for [MH]+ calculated for C25H37Br: 412.1767, Found: 412.1768.

**9,9-Dihexyl-2-pinacolatoboranefluorene (6).** Dry THF (150 mL) and **5** (5.88 g, 14.3 mmoles, 1 equiv.) were added to a 250 mL round bottom flask. The reaction mixture was cooled to –78 ºC and nBuLi (11.5 mL, 28.8 mmoles, 2 Equiv.) was added. This was allowed to stir for 20 minutes followed by the addition of 2-isopropoxy-4,4,5,5-tetramethy-1,3,2-dioxaboralane (5.5 mL, 29.8 mmoles, 2.1 Equiv.). After stirring at –78 ºC for 1 hour this was warmed to room temperature. The reaction mixture was diluted with water, extracted with chloroform, washed twice with water, dried over MgSO4, and the solvent was removed under vacuum. Silica gel column chromatography 100% hexanes-95% hexanes/5% ethyl acetate yielded 5.8g (89%) of **6**. 1H NMR (400 MHz, CDCl3): 7.81 (m, 1H), 7.73 (m, 3H), 7.33 (m, 3H), 1.99 (m, 4H), 1.39 (s, 12H), 1.05 (m, 12H), 0.75 (m, 6H), 0.58 (m, 4H). Exact mass (FAB, NBH) for [MH]+ calculated for C31H49BO2: 459.9549, Found: 459.3532.

**2-(4'-Bromobenzene)-9,9-Dihexylfluorene (7).** A 250 mL round bottom flask was charged with **6** (5.8g, 12.7 mmoles, 1 Equiv.), 1-bromo-4-iodobenzene (12.6 g, 45 mmoles, 3.5 Equiv.), Pd(dppf)Cl2 (0.20 g, 0.25 mmoles, 0.02 Equiv.), NaHCO3, (10.7 g, 128 mmoles, 10 Equiv.), 75 mL THF, and 18.5 mL water. The solution was degassed, placed under argon in an oil bath at 60 ºC for 2.5 days. The reaction mixture was cooled to room temperaturen, diluted with water, extracted with chloroform, dried over MgSO4, and the solvent was removed under vacuum. Silica gel chromatography with 100% hexanes yielded 3.6 g (60%) of **7**. 1H NMR (400 MHz, CDCl3): 7.74 (m, 2H), 7.55 (m, 6H), 7.34 (m, 3H), 2.01 (m, 4H), 1.06 (m, 12H), 0.75 (t, *J* = 7.1, 6H), 0.67 (m, 4H). 13C NMR (100 MHz, CDCl3):  151.7, 151.2, 141.0, 140.8, 140.7, 138.9, 132.0, 128.9, 127.4, 127.0, 125.9, 123.1, 121.5, 121.4, 120.2, 120.0, 55.4, 40.6, 31.7, 29.9, 23.9, 22.8, 14.2. Exact mass (FAB, NBH) for [MH]+ calculated for C31H37Br: 488.2079, Found: 488.2082.

**9,9-Dihexyl-2-(4'-pinacolatoboralanebenzene)fluorene (8).** The synthesis of **6** was repeated with **7** (2.4 g, 4.9 mmoles, 1 Equiv.) and 80 mL THF. Silica gel chromatography 100% hexanes - 95% hexanes/5% ethyl acetate yielded 1.65 g (63%) of **8**. 1H NMR (400 MHz, CDCl3):  7.94 (m, 2H), 7.76 (m, 4H), 7.62 (m, 2H), 7.37 (m, 3H), 2.05 (m, 4H), 1.40 (s, 12H), 1.08 (m, 12H), 0.79 (m, 6H), 0.70 (m, 4H). 13C NMR (100 MHz, CDCl3):  151.6, 151.2, 144.6, 140.9, 140.8, 139.9, 135.5, 127.3, 126.9, 126.7, 126.3, 123.1, 121.7, 120.1, 119.9, 84.0, 55.4, 40.6, 31.7, 29.9, 25.1, 25.0, 23.9, 22.8, 14.2. Exact mass (FAB, NBH) for [MH]+ calculated for C37H49BO2: 535.3862, Found: 535.3859.

**9,9-Dihexyl-2-(phenyl-4'-(pyridin-2''-yl))fluorene (9).** A 150 mL round bottom flask equipped with a reflux condenser was charged with **8** (1.65 g, 3.1 mmoles, 1 equiv), 2-bromopyridine (2.0 mL, 21 mmoles, 6.9 Equiv.), Pd(dppf)Cl2 (0.21 g, 0.25 mmoles, 0.1 Equiv.), sodium hydroxide (1.37 g, 34 mmoles, 11 Equiv.), tetrabutylammonium bromide (1.0 g, 3.1 mmoles, 1 Equiv.), and 75 mL THF. The reaction mixture was degassed and placed in an oil bath at 75 °C for 2 days. Once the reaction mixture was cooled it was diluted with chloroform, washed twice with water, dried over MgSO4, and solvent was removed under vacuum. The crude product was purified by silica gel chromatography 5% ethyl acetate/ 95% hexanes to yield 1.13 g (77%) of **9**. 1H NMR (400 MHz, CDCl3): 8.73(d, *J* = 4.8 Hz, 1H), 8.12 (d, *J* = 8.4 Hz, 2H), 7.70 (m, 2H), 7.64 (m, 3H), 7.25 (m, 1H), 2.01 (m, 4H), 1.06 (m, 12H), 0.76 (m, 6H), 0.68 (m, 4H). 13C NMR (100 MHz, CDCl3):  157.3, 151.6, 151.2, 149.9, 142.4, 140.8, 139.5, 138.2, 136.9, 127.6, 127.4, 127.3, 126.9, 126.1, 123.1, 122.3, 121.6, 120.6, 120.1, 119.9, 55.4, 40.6, 31.6, 29.9, 23.9, 22.7, 14.2. Exact mass (FAB, NBH) for [MH]+ calculated for C36H41N: 487.3239, Found: 487.3237.

**Tris[9,9-Dihexyl-2-(phenyl-4'-(-pyridin-2''-yl))fluorene]iridium(III) (3).** A 50 mL round bottom flask was charged with **9** (0.58 g, 1.2 mmoles, 6 Equiv.), Ir(acac)3 (0.098g, 0.2 mmoles, 1 Equiv.), and 15 mL of glycerol. The reaction mixture was degassed and heated at reflux. After 16 hours the reaction mixture was cooled to room temperature and dilutied with 5 mL of water. The crude mixture was and extracted 6 times with 50 mL of methylene chloride and the solvent was removed under vacuum. Purification by silica gel chromatography with 30% CH2Cl2/70% hexanes yielded 0.097 g, 31%, of **3**. 1H NMR (400 MHz, CDCl3):  7.92(d, *J* = 8 Hz, 3H), 7.53 (m, 24H), 7.31 (m, 15H), 6.92 (t, *J* = 6 Hz, 3H), 1.80 (m, 12 H), 0.81 (m, 66 H). 13C NMR (100 MHz, CDCl3):  166.8, 161.8, 151.1, 147.4, 143.4, 141.9, 141.3, 140.9, 140.0, 136.1, 135.5, 126.7, 126.0, 124.5, 122.9, 122.0, 121.3, 119.9, 119.7, 119.1, 55.1, 40.6, 32.0, 31.7, 30.2, 30.0, 24.0, 23.0, 22.8, 14.3, 14.2. Exact mass (MALDI TOF) for [MH]+ calculated for C108H120N3Ir: 1651.3, Found: 1652.3.

**9,9-Dihexyl-2-(pyridin-2’-yl)-fluorene (10).** A 100 mL round bottom flask was charges with **6** (1.06 g, 2.31 mmoles, 1 Equiv.), 2-bromopyridine (0.41 mL, 4.28 mmoles, 1.9 Equiv.), Pd(dppf)Cl2 (0.15 g, 0.18 mmoles, 0.08 Equiv.), sodium hydroxide (1.35 g, 33.7 mmoles, 14.6 Equiv), tetrabutylammonium bromide (0.9650 g, 3.0 mmoles, 13 Equiv.), and THF (30 mL). The solution was degassed, placed under argon, and heated at 75 ºC in an oil bath for 2.5 days. The reaction mixture was cooled, diluted with chloroform, washed three times with water, dried over MgSO4, and solvent was removed under vacuum. Excess 2-bromopyridine was removed by heating the crude mixture, 80 ºC, under high vacuum conditions. Silica gel column chromatography (50% CHCl3/50% hexanes) yielded **10** (0.50 g, 52 %). 1H NMR (400 MHz, CDCl3): 8.75 (m, 1H), 8.01 (m, 2H), 7.79 (m, 4H), 7.35 (m, 3 H), 7.23 (m, 1H), 2.05 (m, 4H), 1.04 (m, 12 H), 0.71 (m, 10 H). 13C NMR (100 MHz, CDCl3):  158.0, 151.5, 151.4, 149.8, 142.3, 140.8, 138.3, 136.9, 127.5, 127.0, 126.0, 123.1, 122.1, 121.4, 120.9, 120.2, 120.1, 55.5, 40.6, 31.7, 29.9, 23.9, 22.8, 14.2 . Exact mass (FAB, NBH) for [MH]+ calculated for C30H37N: 411.2929, Found: 411.2922.

**Tris (9,9-Dihexyl-2-(pyridin-2'-yl)-fluorene)iridium (III) (2).** A 50 mL round bottom flask was charged with **10** (0.45 g, 1.1 mmoles, 5.2 Equiv.), Ir(acac)3 (0.11 g, 0.22 mmoles, 1 Equiv.), and 25 mL of glycerol. The mixture was degassed under vacuum at 120 ºC for 1.5 hours, placed under argon and heated at reflux. After 16 hours the reaction mixture was cooled and diluted with 2 mL of water. This was extracted 6 times with 50 mL portions of methylene chloride, which was removed under vacuum. Silica gel column chromatography 10% CHCl3/90% hexanes yielded **2** (0.045 g, 11% yield). 1H NMR (400 MHz, CDCl3):  7.95 (d, *J* = 8.4 Hz, 3H), 7.55 (m, 9H), 7.11 (m, 15 H), 7.79 (t, J = 7.3 Hz, 3 H), 3.01 (m, 12 H), 1.02 (m, 66 H). 13C NMR (100 MHz, CDCl3):  167.2, 160.5, 151.6, 147.3, 143.2, 143.0, 142.4, 142.0, 135.6, 128.3, 126.4, 122.4, 121.2, 120.6, 119.2, 118.3, 54.2, 41.4, 411, 31.7, 30.2, 30.1, 24.0, 23.2, 22.8, 14.3. Exact mass (MALDI TOF) for [MH]+ calculated for C90H108N3Ir: 1423.8, Found: 1423.1.

**2,5-bis-(2'-(9',9'-dihexylfluorene))pyridine (11).** A 100 mL round bottom flask, with reflux condensor was charged with **6** (2.65 g, 5.8 mmoles, 4 Equiv.), 2,5-dibromopyridine (0.47 g, 1.9 mmoles, 1 Equiv), Pd(dppf)Cl2 (0.15 g, 0.19 mmoles, 0.1Equiv.), sodium hydroxide (1.25 g, 31 mmoles, 16 Equiv.), tetrabutylammonium bromide (1.04 g, 3.2 mmoles, 1.6 Equiv.), and THF (20 mL). The solution was degassed, placed under argon, and heated in an oil bath at 75 °C for 2.5 days. The solution was cooled to room temperature and diluted chloroform. The organic layer was washed three times with water, dried over MgSO4, and the solvent was removed under vacuum. Silica gel column chromatography (25% CHCl3/75% hexanes) yielded **11** (0.81g, 53% yield). 1NMR (400 MHz, CDCl3): 9.06 (d, *J* = 1.8 Hz, 1H), 8.07 (m, 3H), 7.92 (d, J = 8.3 Hz, 1 H), 7.83 (d, J = 11 Hz, 2 H), 7,72 (m, 2H), 7.65 (m, 2H), 7.37 (m, 6H), 2.05 (m, 8H), 1.05 (m, 24 H), 0.76 (m, 14H). 13C NMR (100 MHz, CDCl3):  156.5, 152.0, 151.6, 151.5, 151.2, 148.3, 142.3, 141.3, 140.8, 140.6, 137.0, 136.6, 135.3, 135.1, 127.5, 127.0, 126.9, 125.9, 128.8, 123.1, 121.5, 121.3, 120.6, 120.4, 120.1, 120.0, 55.5, 55.4, 40.6, 40.5, 31.7, 31.6, 29.9, 29.8, 24.0, 22.8, 22.7, 14.2. Exact mass (FAB, NBH) for [MH]+ calculated for C55H69N: 743.5430, Found: 743.5422.

**Tris (2,5-bis-2'-(9',9'-dihexylfluorene)pyridine)iridium (III) (4).** A 25 mL round bottom flask with a reflux condensor was charged with **11** (0.68 g, 0.91 mmoles, 4.7 Equiv.), Ir(acac)3 (0.095 g, 0.20 mmoles, 1 Equiv.), and gycerol (12 mL). This solution was degassed at 120 ºC for 1.5 hours, placed under argon and heated at reflux for 16 hours. The reaction mixture was cooled, diluted with 2 mL of water, and extracted with 6 portions of 50 mL of methylene chloride, which was removed under vaccum. Silica gel column chromatography 10% CHCl/90% hexanes to yield **4** (0.036 g, 8%). 1NMR (400 MHz, CDCl3): 8.05 (m, 9H), 7.64 (m, 9H), 7.22 (m, 30 H), 1.88 (m, 24H), 0.90 (m, 132H). 13C NMR (100 MHz, CDCl3):  166.14, 160.53, 152.2, 151.7, 150.9, 145.1, 143.1, 142.9, 142.0, 141.3, 140.4, 135.8, 134.3, 133.9, 128.5, 127.5, 127.0, 126.5, 126.4, 125.1, 123.1, 122.4, 120.6, 120.5, 120.3, 120.0, 119.2, 118.5, 55.3, 54.2, 41.1, 40.9, 40.4, 40.3, 31.9, 31.7, 31.6, 31.5, 30.2, 30.1, 29.9, 29.8, 24.0, 23.9, 23.1, 22.9, 22.7, 22.6, 14.3, 14.1. Exact mass (MALDI TOF) for [MH]+ calculated for C165H204N3Ir: 2420.9, Found: 2420.8.
